# Supplementary material for: Economical Models for Electron Densities
Source: PubMed Central journal article supplement — J Phys Chem A. 2023 Oct 31;127(44):9346–56. doi: 10.1021/acs.jpca.3c04363 (PMC10642579; doi:10.1021/acs.jpca.3c04363), 2023-10-31
Supplement: jp3c04363_si_001.pdf [file jp3c04363_si_001.pdf]

# Supporting Information:

## Economical Models for Electron Densities

Ellena K. G. Black and Peter M. W. Gill\*

*School of Chemistry, University of Sydney, Camperdown, NSW 2006, Australia*

E-mail: [p.gill@sydney.edu.au](mailto:p.gill@sydney.edu.au)

Phone: +61 2 8627 9486

# 1 Supporting Information : The Golub-Welsch algorithm

In the modeling methodology discussed in this paper, we use Gauss-Christoffel quadrature theory to construct initial guesses for exponents ( $\beta_i$ ) and initial guesses for the centers ( $B_i$ ). In each case, we must construct the  $m$  Gauss-Christoffel roots  $x_i$  and weights  $w_i$  from the first  $2m + 1$  moments

$$\mu_l = \int_a^b x^l w(x) dx \quad (l = 0, 1, \dots, 2m) \quad (1)$$

of the relevant weight function  $w(x)$ . Here, for the reader's convenience, we summarize the Golub-Welsch algorithm<sup>?</sup> for this task. To illustrate the algorithm, we apply it to the case where  $w(x) = -\ln x$  on  $[0, 1]$  and  $m = 3$  and obtain results that agree with those in Table I of the 1965 paper by Anderson.<sup>?</sup>

**Step 1:** Use the moments  $\mu_0, \mu_1, \dots, \mu_{2m}$  to form an  $(m + 1) \times (m + 1)$  Hankel matrix

$$\mathbf{H} = \begin{pmatrix} 1 & 1/4 & 1/9 & 1/16 \\ 1/4 & 1/9 & 1/16 & 1/25 \\ 1/9 & 1/16 & 1/25 & 1/36 \\ 1/16 & 1/25 & 1/36 & 1/49 \end{pmatrix} \quad (2)$$

**Step 2:** Form the diagonal and sub-diagonals of the Cholesky triangle of  $\mathbf{H}$

$$\mathbf{L} = \begin{pmatrix} 1.000\ 000 & 0 & 0 & 0 \\ 0.250\ 000 & 0.220\ 479 & 0 & 0 \\ - & 0.157\ 485 & 0.053\ 411 & 0 \\ - & - & 0.064\ 081 & 0.013\ 162 \end{pmatrix} \quad (3)$$

**Step 3:** Form a symmetric  $m \times m$  tridiagonal matrix with diagonal elements equal to the

differences of the ratios  $L_{i+1,i}/L_{i,i}$  and subdiagonal elements equal to the ratios  $L_{i+1,i+1}/L_{i,i}$

$$\mathbf{T} = \begin{pmatrix} 0.250\,000 & 0.220\,479 & 0 \\ 0.220\,479 & 0.464\,286 & 0.242\,249 \\ 0 & 0.242\,249 & 0.485\,482 \end{pmatrix} \quad (4)$$

**Step 4:** The eigenvalues of  $\mathbf{T}$  are the roots  $x_i$ . The squares of the first components of the normalized eigenvectors of  $\mathbf{T}$ , scaled by  $\mu_0$ , are the weights  $w_i$ .

$$\{x_1, x_2, x_3\} = \{0.063\,891, 0.368\,997, 0.766\,880\} \quad (5)$$

$$\{w_1, w_2, w_3\} = \{0.513\,405, 0.391\,980, 0.094\,615\} \quad (6)$$

The Cholesky decomposition of a symmetric, positive definite matrix normally requires  $m^3/3$  floating-point operations (flops).<sup>?</sup> However, Step 2 involves a Hankel matrix and Phillips has devised an algorithm that decomposes such a matrix in only  $4m^2$  flops.<sup>?</sup>

Calculating the eigenvalues of a real symmetric matrix normally requires  $4m^3/3$  flops.<sup>?</sup> However, Step 4 involves a tridiagonal matrix and Dhillon has devised an algorithm that diagonalizes such a matrix in only  $O(m^2)$  flops.<sup>?</sup>

In a thorough analysis of the problem of finding roots and weights for quadrature,<sup>?</sup> Gautschi has concluded that the use of the moments of the weight function  $w(x)$  can produce devastating numerical instabilities for large  $m$ . However, we have not observed any significant instabilities in the present work, because we are interested in only modest values of  $m$ .

We note that, if one attempts to model  $\widehat{\rho}(k)$  by a sum of  $m \geq n$  gaussians, the Hankel matrix of moments is singular and the initial guess algorithm breaks down. In practice, of course, this is not very important.
